# Intermittent Fasting Enhances Hippocampal Npy Expression to Promote Neurogenesis Following Traumatic Brain Injury

Shuqiang Cao<sup>1,\*</sup>, Manrui Li<sup>1,\*</sup>, Yuwen Sun<sup>2</sup>, Wenjie Yang<sup>2</sup>, Hao Dai<sup>3</sup>, Yadong Guo<sup>4</sup>, Yi Ye<sup>5</sup>, Zheng Wang<sup>6</sup>, Xiaoqi Xie<sup>7</sup>, Xiameng Chen<sup>3,§</sup>, Weibo Liang<sup>1,§</sup>.

1. Department of Forensic Genetics, West China School of Basic Medical Sciences and Forensic Medicine, Sichuan University, Chengdu, China
2. West China School of Basic Medical Sciences and Forensic Medicine, Sichuan University, Chengdu, China
3. Department of Forensic Pathology and Forensic Clinical Medicine, West China School of Basic Medical Sciences and Forensic Medicine, Sichuan University, Chengdu, China
4. Department of Forensic Science, School of Basic Medical Sciences, Central South University, Changsha, Hunan 410013, China
5. Department of Forensic Toxicological Analysis, West China School of Basic Medical Sciences & Forensic Medicine, Sichuan University, Chengdu 610041, Sichuan, China
6. Institute of Forensic Medicine, West China School of Basic Science and Forensic Medicine, Sichuan University, Chengdu, China
7. Department of Critical Care Medicine, West China Hospital, Sichuan University, Chengdu, China

\* These authors contributed equally to this work.

§ Corresponding author:

Weibo Liang, Department of Forensic Genetics, West China School of Basic Medical Sciences and Forensic Medicine, Sichuan University, Chengdu, China. Email: [liangweibo@gmail.com](mailto:liangweibo@gmail.com).

Xiameng Chen, Department of Forensic Pathology and Forensic Clinical Medicine, West China School of Basic Medical Sciences and Forensic Medicine, Sichuan University, Chengdu, China. Email: [xmchen990@gmail.com](mailto:xmchen990@gmail.com).

Funding: this work is supported by “the Fundamental Research Funds for the Central Universities”.

Conflict of interest: None.

## Abstract

Interventions for preventing cognitive dysfunction post traumatic brain injury (TBI) is limited. Given that adult hippocampal neurogenesis (AHN) after brain injury contributes to cognitive recovery, and that the AHN is potentially affected by nutritional factors, we asked whether fasting could promote AHN and thus ameliorates cognitive defects after TBI. Here we show that a one-month intermittent fasting (IF) regimen enhanced proliferation of neural stem cells (NSCs) in the subgranular zone (SGZ) of hippocampus 3 days post TBI, as well as improved cognitive performance in Morris water maze (MWM) test. Furthermore, an increase in hippocampal Npy expression was detected in IF group after injury, compared to the mice fed ad libitum (AL), and locally knock-down of Npy in vivo attenuated the aforementioned effects of IF in TBI. These findings suggest that IF promotes AHN following TBI by a mechanism involving enhancement of Npy expression, which may offer novel interventions that might prevent cognitive dysfunction caused by injury.

## Key words

intermittent fasting, adult hippocampal neurogenesis, cognition, traumatic brain injury

## Introduction

The link between TBI and long-term cognitive dysfunction is increasingly established[1, 2], while therapeutic interventions to prevent this impairment is quite limited, resulting in an enormous social and economic burden.

It is known that the hippocampus is critical in maintaining cognitive function, especially in learning and memory storage[3]. Hippocampal dysfunction- a major aspect of pathology following TBI, usually acts as the cause of cognitive impairment. Evidences have repeatedly shown a relationship between adult hippocampal neurogenesis (AHN) and its dependent cognitive function in rodents[4]. Impairments in the use of spatial strategies and retention of spatial locations in the water maze tests have been found under AHN ablation via

administration of methylazoxymethanol acetate (MAM) or TMZ[5-7]. Subsequently, defects in spatial memory and electrophysiological properties of the dentate gyrus (DG) were confirmed under genetic ablation of AHN[8, 9], highlighting the role of AHN in cognitive function. In addition, in an animal study involving TBI, the ability to learn spatial memory tasks was also found lost in mice treated with temporally specified ablation of neurogenesis[10]. To this end, targeting AHN may provide novel therapeutic options for the treatment or prevention of cognitive defects after brain injury.

Recently, adult neurogenesis has been found to be affected by nutritional factors[11]. Also, for the past few years, positive relationship between food restriction and hippocampus-dependent cognition has been proposed[12, 13]. Intermittent fasting (IF) is a novel strategy of energy restriction, which entails drastic reductions in food intake for varying periods of time. Recent efforts have shown that cognition in multiple domains could be enhanced by IF[14-17]. In clinic trials, long-term energy restriction was demonstrated to induce improvements in executive function, verbal memory and global cognition in adults with overweight and mild cognitive impairments[18]. Also, another clinical study involving older adults revealed the relationship between a short-term food restriction and an improvement in verbal memory[19]. Hence, there is a great possibility that IF may enhance injury- induced AHN, improving its related cognitive performance in TBI.

This study aimed to explore the impact of IF on the AHN and the hippocampus-dependent cognitive recovery process responding to moderate TBI, as well as the underlying mechanisms. Gaining this detailed understanding of the link between IF and hippocampal behavior under TBI is paramount for the development of new interventions, alleviating the associated social, and economic burdens.

## **Methods**

### **1. Animals**

8-10 weeks C57BL/6N mice, half male, half female, weighing from 21-23g were utilized in our study. The mice were randomly assigned to each group, with 10~18 mice per group. All the mice were housed in the AAALAC (Association for Assessment and Accreditation of

Laboratory Animal Care International) approved animal facility under a 12-h light/dark cycle, 22–25 °C, 50% relative humidity. Animal procedures were performed based on the Ethical Research Committee guidelines of Sichuan University of Medical Sciences.

## 2. IF

We used an alternate day fasting regimen in this study. Mice were fasted one day and had free access to food and water the next day. On fasting day, food pellets were removed from the cage, while water was available. The control group was fed on a standard mice diet ad libitum.

## 3. CCI Model

Briefly, mice were anesthetized with 4% isoflurane and maintained on a 2% concentration. Then the mice were placed and fixed on a stereotaxic frame. A midsagittal incision was made in the scalp and periosteum under sterile conditions. A 3.5mm diameter craniotomy was made posterior to the coronal suture with a surgical drill, and then a 3mm flat hitting tip was vertically placed on the exposed dural surface for cortical impact. After the impact, bone window was covered by sterile plastic film, and skin was intermittently sutured and disinfected. For more details, please see[20].

## 4. Western Blot Assay, H&E staining, Immunohistochemistry (IHC) and qPCR

As previously described[20-22].

## 5. Morris Water Maze (MWM) Assay

The experiment lasted for 5 days and all mice were scheduled to be trained 4 times per day for a fixed period of time. During training, the mice were placed into the pool through four entry points. The time that mice took to enter the water to find the submerged hidden platform and stand on it was recorded as latency. If the mice could find it themselves, they were left on the platform. If the mice did not find the platform within 90 s, they were gently pulled on the platform for 10s. Each mouse was placed into the pool through four water inlet points with a 30s training interval. On the fifth day, the mice were placed in the water at the same inlet point for each quadrant, and the swimming path of the mice over 90 s was recorded. The time the mice stayed in the target quadrant platform was recorded and used to evaluate the spatial localization ability and long-term memory of the mice. The shorter latency and longer staying time indicate better spatial localization ability and long-term memory, which is associated with hippocampal-dependent learning ability. For more details, please see[20].

## 6. Intracerebroventricular (I.C.V.) injection

AAV-Npy-shRNA and AAV-scramble were packaged at a titer of  $5.28 \times 10^{10}$  IFU/mL and  $12.30 \times 10^{10}$  IFU/mL (purchased from Shanghai GenePharma Co., Ltd). Packaged Npy-shRNA and scramble were injected into I.C.V. according to the manufacturer's instructions. For I.C.V, each anesthetized mouse received was placed and fixed in the stereotaxic frame and had midsagittal incision on the scalp. A 1.0- or 5.0- $\mu$ l Hamilton syringe (Hamilton, Reno, NV) was used to inject specified quantities of AAV-Npy-shRNA and AAV-scramble in a volume of 0.5  $\mu$ l into the right cerebral ventricle. (location: please see "results").

## 7. Statistical analysis

All statistical analyses were performed and the figures were made using Graphpad Prism 8.4.2 software (San Diego, USA). Values are expressed as the mean  $\pm$  standard deviation(SD). Differences between groups were analyzed using one-way or two-way ANOVA. A p value<0.05 was considered to be statistically significant.

# Results

## IF enhances AHN following TBI

Currently, the effect of IF on neurogenesis in TBI has not been reported. In this study, we used an alternate day fasting regimen (Fig1. A) based on a moderate controlled cortical impact (CCI) model to address this question. Histologically, we found that the 1 months IF resulted in an increase in the number of shuttle-shaped cells with more basophilic staining lining in SGZ (the neurogenic niche in hippocampus), morphologically alike the NSCs (Fig1. B). To validate the identity of these increased shuttle-shaped cells, we conducted immune fluorescence staining against the proliferative marker-ki67, as well as the NSC marker- sox2. As shown in Fig 2, ki67 positive cells in the SGZ was largely increased in the IF pre-conditioned group, compared to the AL fed group (Fig1. C), suggesting an effect of IF in increasing cell proliferation post TBI. Furthermore, almost all of the ki67 positive cells were co-stained with sox2, proving the NSC identity of these proliferating cells. Hence, our results suggested that the SGZ neurogenesis responding to TBI could be enhanced by long-term IF.

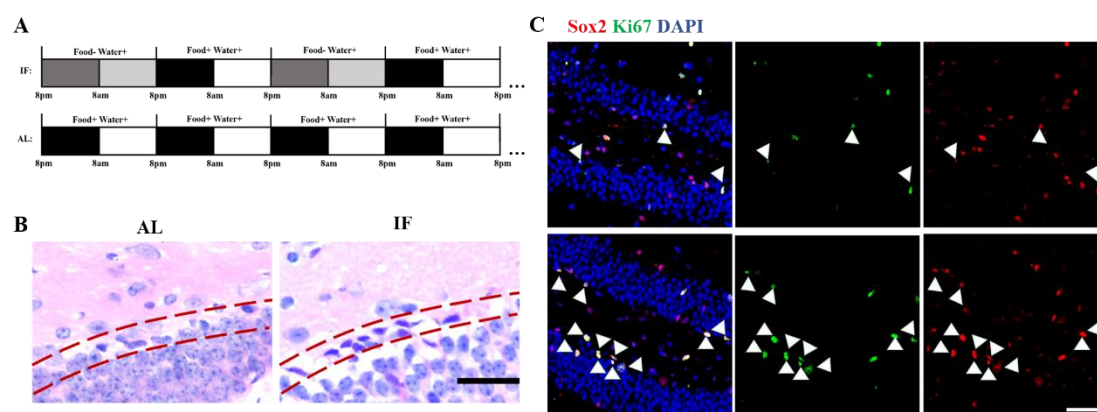

Fig1. AHN following TBI was enhanced under IF pre-condition. A) alternate day fasting regimen. B) H&E staining showed the number of shuttle-shaped cells with basophilic staining was increased in the SGZ (indicated by dashed lines) in IF group on post injury day3, scale =50um. C) immune-staining showed that the ki67 and sox2 positive cells were increased in the SGZ in IF group on post injury day3, scale=100um.

### Cognitive dysfunction post TBI is ameliorated under IF

The hippocampal neurogenesis events are critical in cognition recovery following TBI.

Hence, a de-facto standard for testing the hippocampal function- Morris water maze (MWM), was performed 1 month post injury to test the impact of IF on cognitive performance post injury (Fig2. A-D). Results showed that the IF preconditioning before a moderate TBI resulted in improved cognition post injury, as seen by significantly decreased goal latency (Fig2. A), demonstrating that the post injury cognitive defects are partly alleviated by IF pre-treatment.

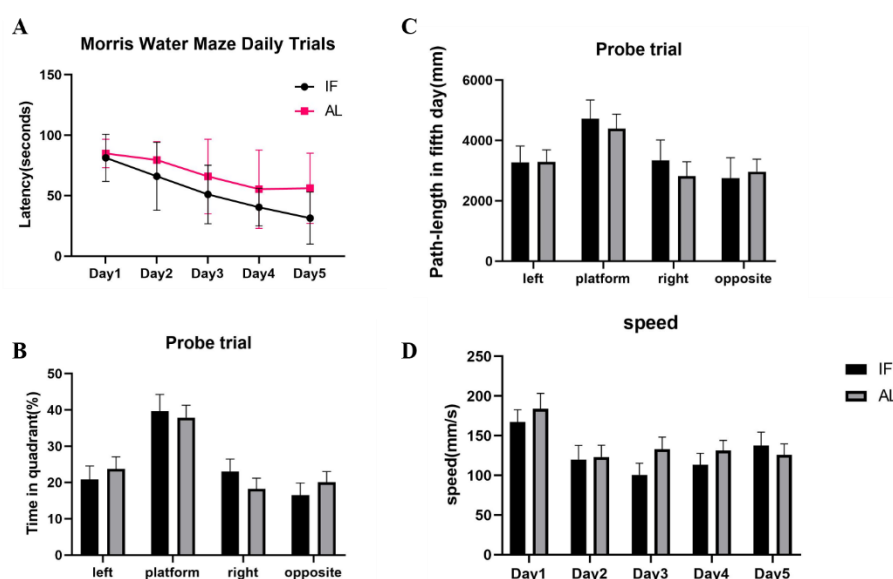

Fig2. IF pre-treatment ameliorated cognitive dysfunction 1month post TBI. A) IF group exhibited significantly decreased goal latency in MWM test ( $P < 0.05$ ). B) time in quadrants C) path length and D) speed tests did not show significant differences between IF and AL groups.

### Enhanced Npy expression contributes to the effects of IF in TBI

To clarify the mechanisms underlying the neuroprotective effect of IF in TBI, we focused on genes involved in both neurogenesis promoting and food intake regulation. It has been known that a neuroprotective peptide- Npy, is largely increased in hypothalamus responding to fasting. Also, it has been suggested to participate in neurogenesis event. However, whether Npy in murine hippocampus could be induced by IF remains unclear. To address this, we conducted immuno- staining against Npy in IF and AL hippocampus, respectively. We found an obvious increase of Npy immunoactivity in IF hippocampus (Fig3. A). In addition, WB results further validated the elevated hippocampal Npy expression in the IF group (Fig3. B). results further validated the elevated hippocampal Npy expression in the IF group (Fig3. B).

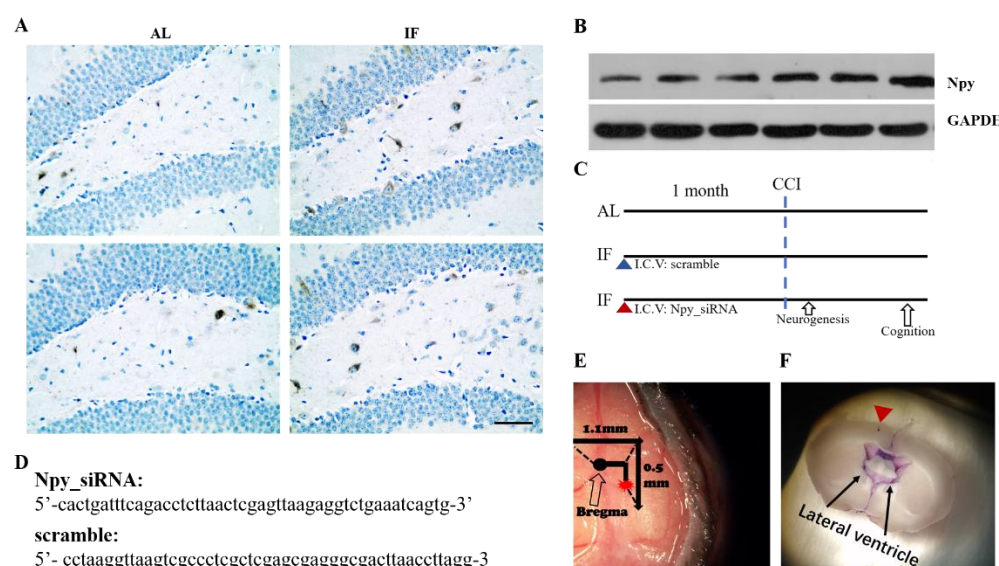

Fig3. Increased Npy expression may be responsible for the IF-enhanced AHN following TBI. A) more Npy immune-positive cells in dentate gyrus were detected under IF pre-conditioning B) WB results validated the elevated hippocampal Npy expression in the IF group. C) schematics showing timelines for interventions in each group, and examinations post injury. D) sequenced of Npy\_siRNA and the scramble. E) injection cite in I.C.V. F) validation of success injection as seen by purple dye in the lateral ventricles.

In order to test whether the IF-enhanced neurogenesis following TBI was mediated by Npy, we used siRNA to locally knock down Npy in vivo (Fig3. C, D). AAV-packaged siRNA was delivered through I.C.V (Fig3. E, F), and the knock-down effect of Npy\_siRNA was validated by WB of hippocampus (Fig4. A, B). Subsequently, we conducted immune-staining to

examine the neurogenesis post TBI in each group. Results showed that the IF-enhanced neurogenesis was attenuated in the Npy knock- down group, while remained intact under scramble\_siRNA treatment (Fig4. C). These results suggested that the IF-enhanced neurogenesis following TBI is mediated via Npy.

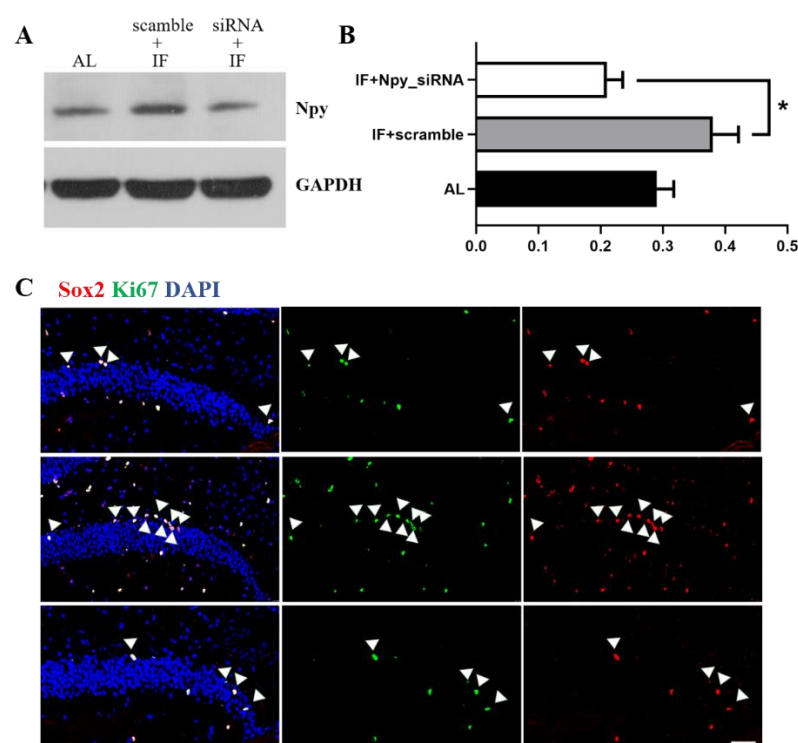

Fig4. Local knock-down of Npy blocked neurogenesis promoting effect of IF in TBI. A) WB and B) its quantification using ImageJ demonstrated that Npy expression was decreased under siRNA treatment, \*P<0.05. C) immunofluorescence results showed that the IF-enhanced neurogenesis was blocked under the Npy knock- down in vivo, scale=100um.

In addition, behavior tests were performed to test spatial learning and memory under Npy\_siRNA treatment (Fig5. A-D). We found that the aforementioned neuroprotective effect of IF in cognitive tests was blocked by Npy knock- down (Fig5. A). In conclusion, our results suggested that the neuroprotective role of IF in TBI was mediated by the increase of hippocampal Npy expression.

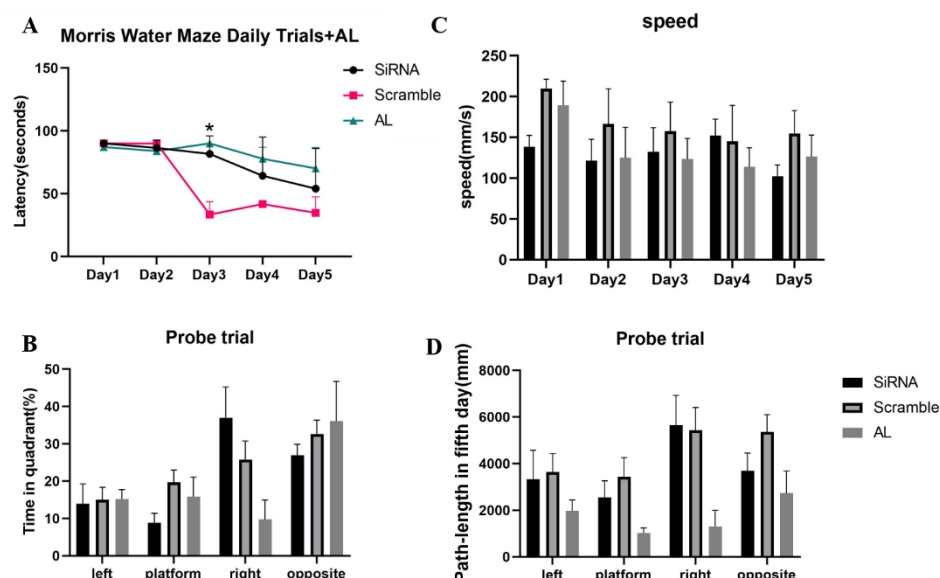

Fig5. Effect of IF in improving cognitive function post TBI was blocked by Npy knock-down. A) The decreased goal latency in MWM test under IF preconditioning was blocked by in vivo knock-down of Npy ( $P < 0.05$ ). B) time in quadrants C) path length and D) speed tests did not show significant differences among each group.

## Discussion

Over decades, hundreds of rodent studies and clinical trials have revealed the health benefits of fasting in multiple aspects, not simply the results of weight loss[23]. For instance, earlier data has shown that food restriction over a lifetime could prolong lifespan and delay senescence[24]. Subsequently, increasing efforts on the studies in multiple fields revealed positive effects of fasting. Evidences have consistently shown that robust efficacy of caloric restriction in cancers, neurodegenerative disease, epilepsy, ischemic injury, cardiovascular disease, ageing, obesity and its related chronic disorders, etc [25-28]. Among different fasting regimens, the IF was intensely studied recently. Except for the beneficial ketone bodies generated during fasting period, IF induces evolutionarily conserved, adaptive responses that enhance disease resistance and promote self-repairment. During the periodic feeding, tissue specific plasticity or growth is engaged. Given the great benefits of IF as well as the absence of effective interventions for preventing the cognitive defects happened post TBI, we tested the potential therapeutic benefits of IF in the hippocampal behavior and its associated cognitive performance based on a CCI model.

In the present study, we suggest a one-month IF regimen before moderate TBI remarkably ameliorates cognitive dysfunction in the MWM test, 3 months post injury, which has been not been reported previously. As a wealth of evidences have demonstrated that the AHN plays a critical role in the hippocampus related cognition, we then examined the post-injury AHN under different dietary strategies. Consistently, immuno-staining against NSC marker and proliferation marker uncovered enhanced proliferation of NSCs in the SGZ neurogenic niche under IF. Although a recent study has suggested the relation between IF and AHN[29], their study did not include brain injury. As the microenvironment largely changes under injury condition, the impact study of IF in TBI is still necessary and valuable. In addition, the IF strategy Sang-Ha et al. used entails a 3 months regimen[29], while our study found that a 1 month IF would be able to increase the post-injury AHN and improve the cognitive performance. Furthermore, an animal study suggested that a single 24 hr fasting could bring benefits in TBI, including the increase of mitochondrial oxidative marker and alleviating oxidative stress and calcium loading[30], while our study failed to detect an AHN promoting effect of IF when the mice were given a shorter time of IF regimen (data not shown).

To clarify the mechanisms underlying the effect of IF in TBI, we focused on Npy, which has been reported to be involved in feeding and neuro-protecting, respectively[31, 32]. It is widely known that Npy neurons in the hypothalamus is critical for energy balance[21, 31]. During fasting, hypothalamic Npy expression is largely elevated and thus promotes food consumption and inhibit satiety, and vice versa[31]. Whereas study on the dynamics of hippocampal Npy in the feeding and fasting cycle is quite limited. Hence, we examined the Npy level in the hippocampus responding to fasting and also found an increasement. In previous studies, Npy was suggested to participate in a wide range of events, such as cognitive behavior, epilepsy, chronic stress, depression, social disorders, etc[33, 34]. Furthermore, it has been demonstrated to be a major regulator for the cell proliferation in SVZ- another NSC niche in adult[35]. We validated Npy as an effector of the IF-enhanced AHN and cognitive recovery post TBI by the incomplete loss-of-function study. We delivered Npy-siRNA via I.C.V to locally knock down Npy in vivo and found a blockage of the effects of IF in TBI, eventually help to elucidate the mechanisms underlying the role of IF in TBI.

In conclusion, our study suggests that a 1 month IF regime could increase post-injury AHN

and alleviate cognitive dysfunction by enhancing hippocampal Npy expression, which may provide new interventions for preventing cognitive impairment after TBI.

## References

- [1] I. Cristofori, H.S. Levin, Traumatic brain injury and cognition, *Handbook of clinical neurology* 128 (2015) 579-611.
- [2] E. Grauwmeijer, M.H. Heijenbrok-Kal, L.D. Peppel, C.J. Hartjes, I.K. Haitsma, I. de Koning, G.M. Ribbers, Cognition, health-related quality of life, and depression ten years after moderate to severe traumatic brain injury: a prospective cohort study, *Journal of neurotrauma* 35(13) (2018) 1543-1551.
- [3] Y. Luo, S. Kuang, H. Li, D. Ran, J. Yang, cAMP/PKA-CREB-BDNF signaling pathway in hippocampus mediates cyclooxygenase 2-induced learning/memory deficits of rats subjected to chronic unpredictable mild stress, *Oncotarget* 8(22) (2017) 35558.
- [4] C. Anacker, R. Hen, Adult hippocampal neurogenesis and cognitive flexibility—linking memory and mood, *Nature Reviews Neuroscience* 18(6) (2017) 335-346.
- [5] M.S. Nokia, M.L. Anderson, T.J. Shors, Chemotherapy disrupts learning, neurogenesis and theta activity in the adult brain, *European Journal of Neuroscience* 36(11) (2012) 3521-3530.
- [6] T. Goodman, S. Trouche, I. Massou, L. Verret, M. Zerwas, P. Roullet, C. Rampon, Young hippocampal neurons are critical for recent and remote spatial memory in adult mice, *Neuroscience* 171(3) (2010) 769-778.
- [7] A. Garthe, J. Behr, G. Kempermann, Adult-generated hippocampal neurons allow the flexible use of spatially precise learning strategies, *PloS one* 4(5) (2009) e5464.
- [8] F. Massa, M. Koehl, T. Wiesner, N. Grosjean, J.-M. Revest, P.-V. Piazza, D.N. Abrous, S.H. Oliet, Conditional reduction of adult neurogenesis impairs bidirectional hippocampal synaptic plasticity, *Proceedings of the National Academy of Sciences* 108(16) (2011) 6644-6649.
- [9] T. Kitamura, Y. Saitoh, N. Takashima, A. Murayama, Y. Niibori, H. Ageta, M. Sekiguchi, H. Sugiyama, K. Inokuchi, Adult neurogenesis modulates the hippocampus-dependent period of associative fear memory, *Cell* 139(4) (2009) 814-827.
- [10] C.A. Blaiss, T.-S. Yu, G. Zhang, J. Chen, G. Dimchev, L.F. Parada, C.M. Powell, S.G. Kernie, Temporally specified genetic ablation of neurogenesis impairs cognitive recovery after traumatic brain injury, *Journal of Neuroscience* 31(13) (2011) 4906-4916.
- [11] S.M. Poullose, M.G. Miller, T. Scott, B. Shukitt-Hale, Nutritional factors affecting adult neurogenesis and cognitive function, *Advances in nutrition* 8(6) (2017) 804-811.
- [12] Y. Hu, Y. Yang, M. Zhang, M. Deng, J.-J. Zhang, Intermittent fasting pretreatment prevents cognitive impairment in a rat model of chronic cerebral hypoperfusion, *The Journal of nutrition* 147(7) (2017) 1437-1445.
- [13] F.R. Andika, J.-H. Yoon, G.S. Kim, Y. Jeong, Intermittent Fasting Alleviates Cognitive Impairments and Hippocampal Neuronal Loss but Enhances Astrocytosis in Mice with Subcortical Vascular Dementia, *The Journal of Nutrition* 151(3) (2021) 722-730.
- [14] Z. Liu, X. Dai, H. Zhang, R. Shi, Y. Hui, X. Jin, W. Zhang, L. Wang, Q. Wang, D. Wang, Gut microbiota mediates intermittent-fasting alleviation of diabetes-induced cognitive impairment, *Nature communications* 11(1) (2020) 1-14.

- [15] B.K. Shin, S. Kang, D.S. Kim, S. Park, Intermittent fasting protects against the deterioration of cognitive function, energy metabolism and dyslipidemia in Alzheimer's disease-induced estrogen deficient rats, *Experimental biology and medicine* 243(4) (2018) 334-343.
- [16] T.C. Ooi, A. Meramat, N.F. Rajab, S. Shahar, I.S. Ismail, A.A. Azam, R. Sharif, Intermittent Fasting Enhanced the Cognitive Function in Older Adults with Mild Cognitive Impairment by Inducing Biochemical and Metabolic changes: A 3-Year Progressive Study, *Nutrients* 12(9) (2020) 2644.
- [17] Z. Liu, T. Yuan, X. Dai, L. Shi, X. Liu, Intermittent Fasting Alleviates Diabetes-induced Cognitive Decline via Gut Microbiota-metabolites-brain Axis (OR32-04-19), *Current developments in nutrition* 3(Supplement\_1) (2019) nzz052. OR32-04-19.
- [18] N.C. Horie, V.T. Serrao, S.S. Simon, M.R.P. Gascon, A.X. Dos Santos, M.A. Zambone, M.M. del Bigio de Freitas, E. Cunha-Neto, E.L. Marques, A. Halpern, Cognitive effects of intentional weight loss in elderly obese individuals with mild cognitive impairment, *The Journal of Clinical Endocrinology & Metabolism* 101(3) (2016) 1104-1112.
- [19] A. Witte, M. Fobker, R. Gellner, S. Knecht, A. Flöel, Caloric restriction improves memory in elderly humans, *Proceedings of the National Academy of Sciences* 106(4) (2009) 1255-1260.
- [20] X. Xiao, Y. Jiang, W. Liang, Y. Wang, S. Cao, H. Yan, L. Gao, L. Zhang, miR-212-5p attenuates ferroptotic neuronal death after traumatic brain injury by targeting Ptgs2, *Molecular brain* 12(1) (2019) 1-12.
- [21] X. Chen, S.C. Wyler, L. Li, A.G. Arnold, R. Wan, L. Jia, M.A. Landy, H.C. Lai, P. Xu, C. Liu, Comparative transcriptomic analyses of developing melanocortin neurons reveal new regulators for the anorexigenic neuron identity, *Journal of Neuroscience* 40(16) (2020) 3165-3177.
- [22] X. Chen, Y. Liu, L. Zhang, P. Zhu, H. Zhu, Y. Yang, P. Guan, Long-term neuroglobin expression of human astrocytes following brain trauma, *Neuroscience letters* 606 (2015) 194-199.
- [23] M.P. Mattson, K. Moehl, N. Ghena, M. Schmaedick, A. Cheng, Intermittent metabolic switching, neuroplasticity and brain health, *Nature Reviews Neuroscience* 19(2) (2018) 63.
- [24] R. Weindruch, R. Sohal, *Seminars in medicine of the Beth Israel Deaconess Medical Center, Caloric intake and aging. N Engl J Med* 337 (1997) 986-94.
- [25] A. Di Francesco, C. Di Germanio, M. Bernier, R. de Cabo, A time to fast, *Science* 362(6416) (2018) 770-775.
- [26] C.R. Mauro, M. Tao, P. Yu, J.H. Treviño-Villerreal, A. Longchamp, B.S. Kristal, C.K. Ozaki, J.R. Mitchell, Preoperative dietary restriction reduces intimal hyperplasia and protects from ischemia-reperfusion injury, *Journal of vascular surgery* 63(2) (2016) 500-509. e1.
- [27] A.L. Hartman, J.E. Rubenstein, E.H. Kossoff, Intermittent fasting: A "new" historical strategy for controlling seizures?, *Epilepsy research* 104(3) (2013) 275-279.
- [28] O. Meynet, J.-E. Ricci, Caloric restriction and cancer: molecular mechanisms and clinical implications, *Trends in molecular medicine* 20(8) (2014) 419-427.
- [29] S.H. Baik, V. Rajeev, D.Y.W. Fann, D.G. Jo, T.V. Arumugam, Intermittent fasting increases adult hippocampal neurogenesis, *Brain and behavior* 10(1) (2020) e01444.
- [30] L.M. Davis, J.R. Pauly, R.D. Readnower, J.M. Rho, P.G. Sullivan, Fasting is neuroprotective following traumatic brain injury, *Journal of neuroscience research* 86(8) (2008) 1812-1822.
- [31] Y. Chen, R.A. Essner, S. Kosar, O.H. Miller, Y.-C. Lin, S. Mesgarzadeh, Z.A. Knight, Sustained NPY signaling enables AgRP neurons to drive feeding, *Elife* 8 (2019) e46348.
- [32] A. Vezzani, G. Sperk, Overexpression of NPY and Y2 receptors in epileptic brain tissue: an endogenous neuroprotective mechanism in temporal lobe epilepsy?, *Neuropeptides* 38(4) (2004)

245-252.

[33] S. Cattaneo, G. Verlengia, P. Marino, M. Simonato, B. Bettegazzi, NPY and Gene Therapy for Epilepsy: How, When,... and Y, *Frontiers in Molecular Neuroscience* 13 (2021) 261.

[34] C. Tang, J. Hu, HDAC1-Mediated MicroRNA-124-5p Regulates NPY to Affect Learning and Memory Abilities in Rats with Depression, *Nanoscale Research Letters* 16(1) (2021) 1-12.

[35] N. Thiriet, F. Agasse, C. Nicoleau, C. Guégan, F. Vallette, J.L. Cadet, M. Jaber, J.O. Malva, V. Coronas, NPY promotes chemokinesis and neurogenesis in the rat subventricular zone, *Journal of neurochemistry* 116(6) (2011) 1018-1027.
